# Supplementary material for: Self-assembly of collagen bundles and enhanced piezoelectricity induced by chemical crosslinking
Source: Royal Society of Chemistry journal article supplement (doi:10.1039/c9nr04750f), 2019-01-01
Supplement: c9nr04750f1.pdf [file c9nr04750f1.pdf]

# Supplementary Material: Enhanced piezoelectricity and self-assembly of collagen bundles induced by chemical crosslinking

July 3, 2019

## 1 Atomic Force Microscopy

### 1.1 Quantitative Nanomechanical Mapping

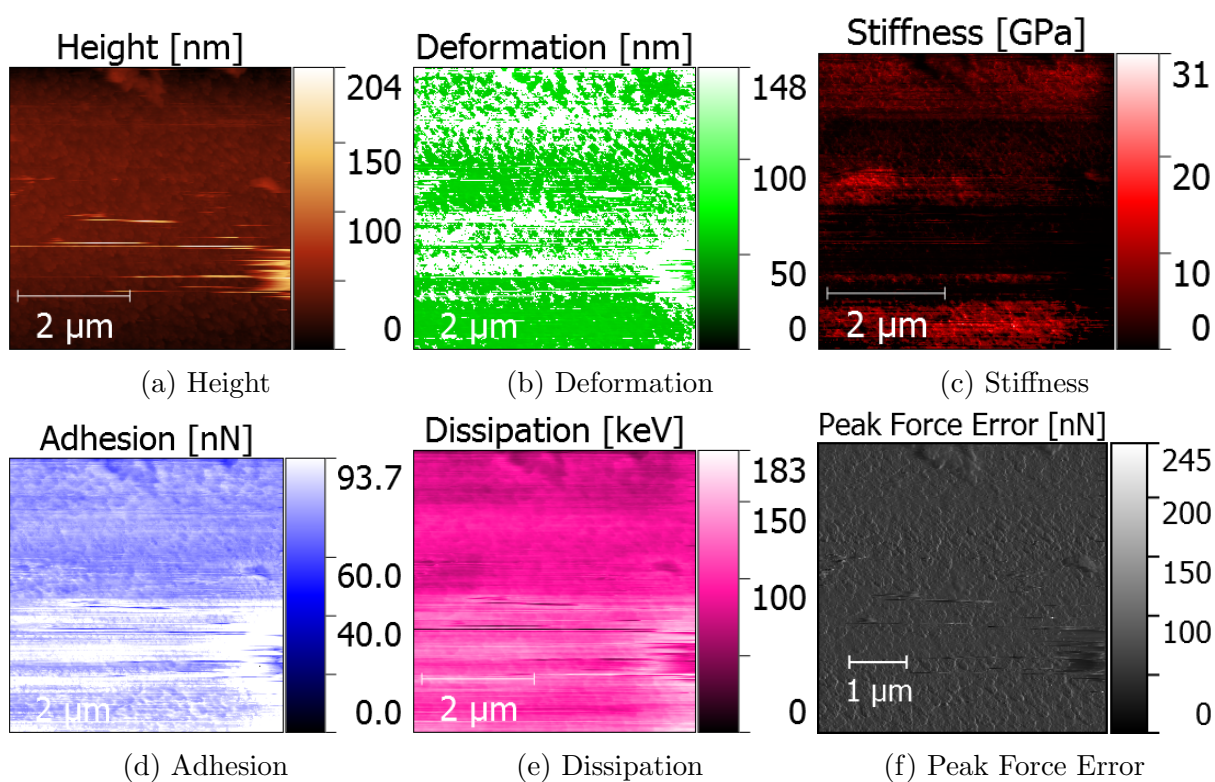

Figure 1: QNM Channels: ITO coated glass

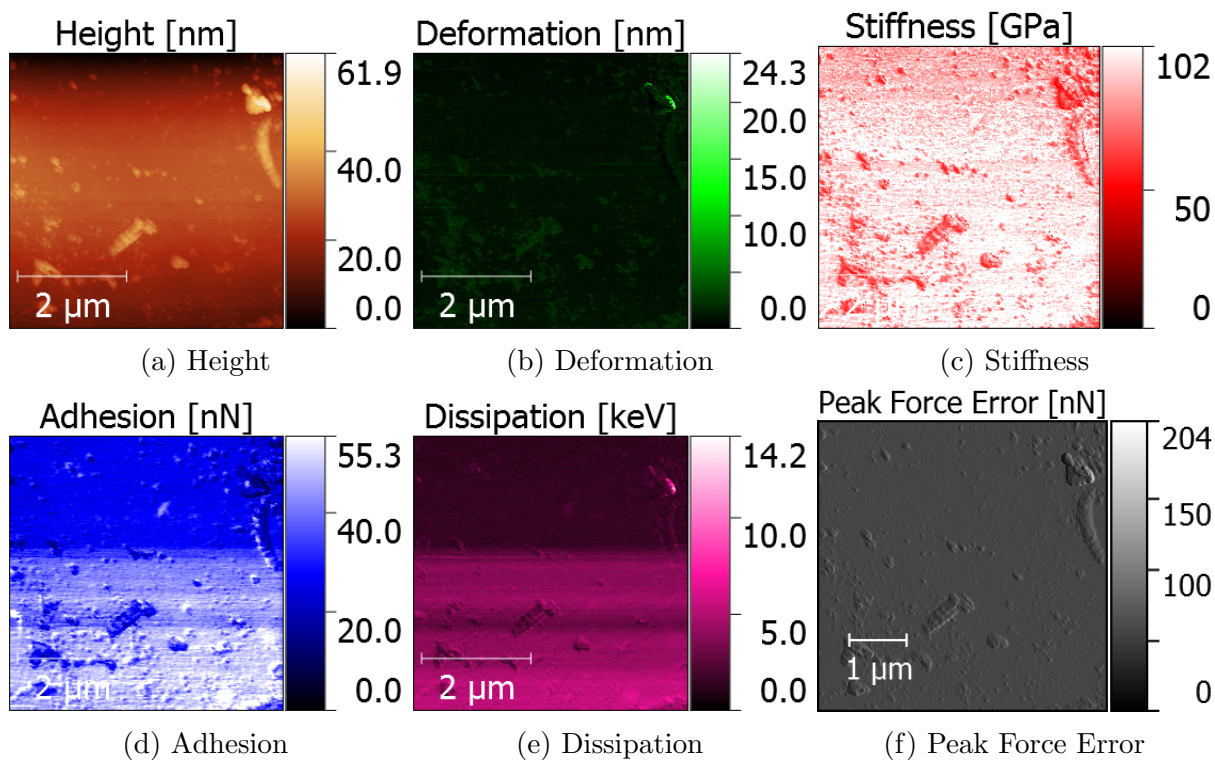

Figure 2: QNM Channels: Borosilicate glass

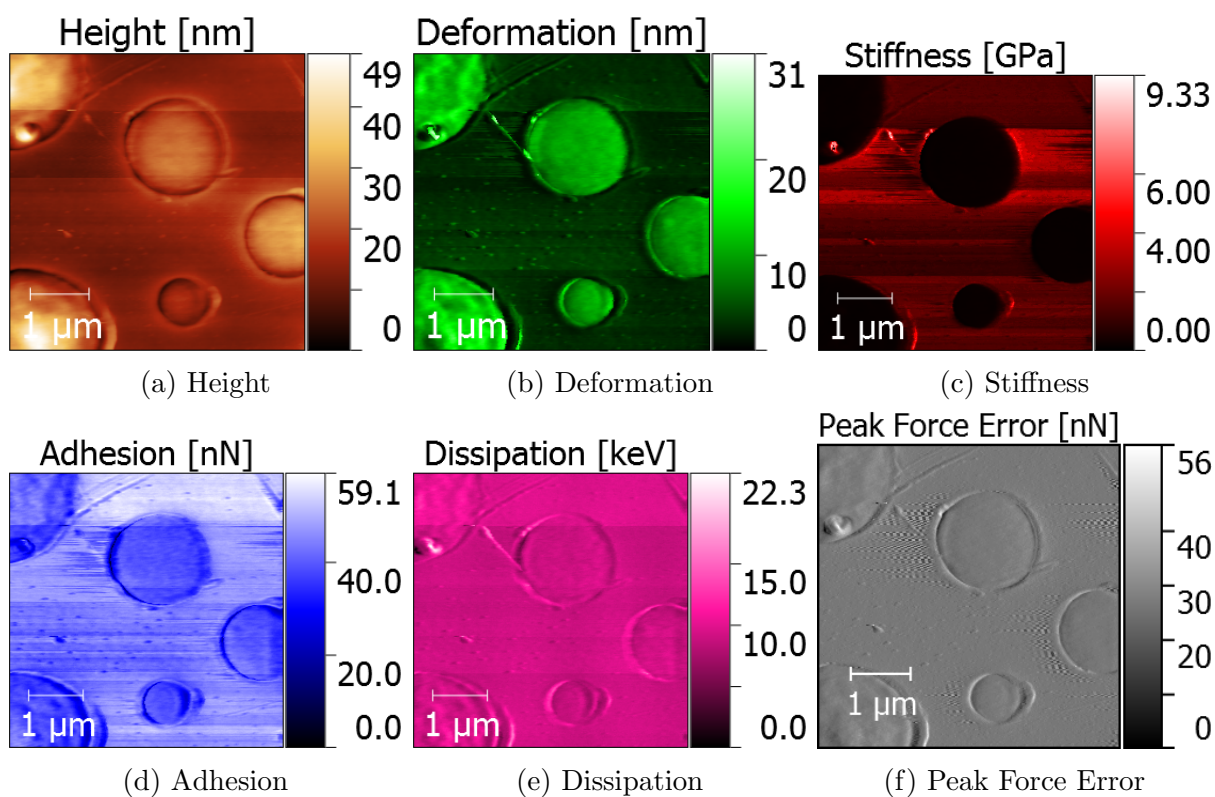

Figure 3: QNM Channels: PS-LDPE Calibration Samples

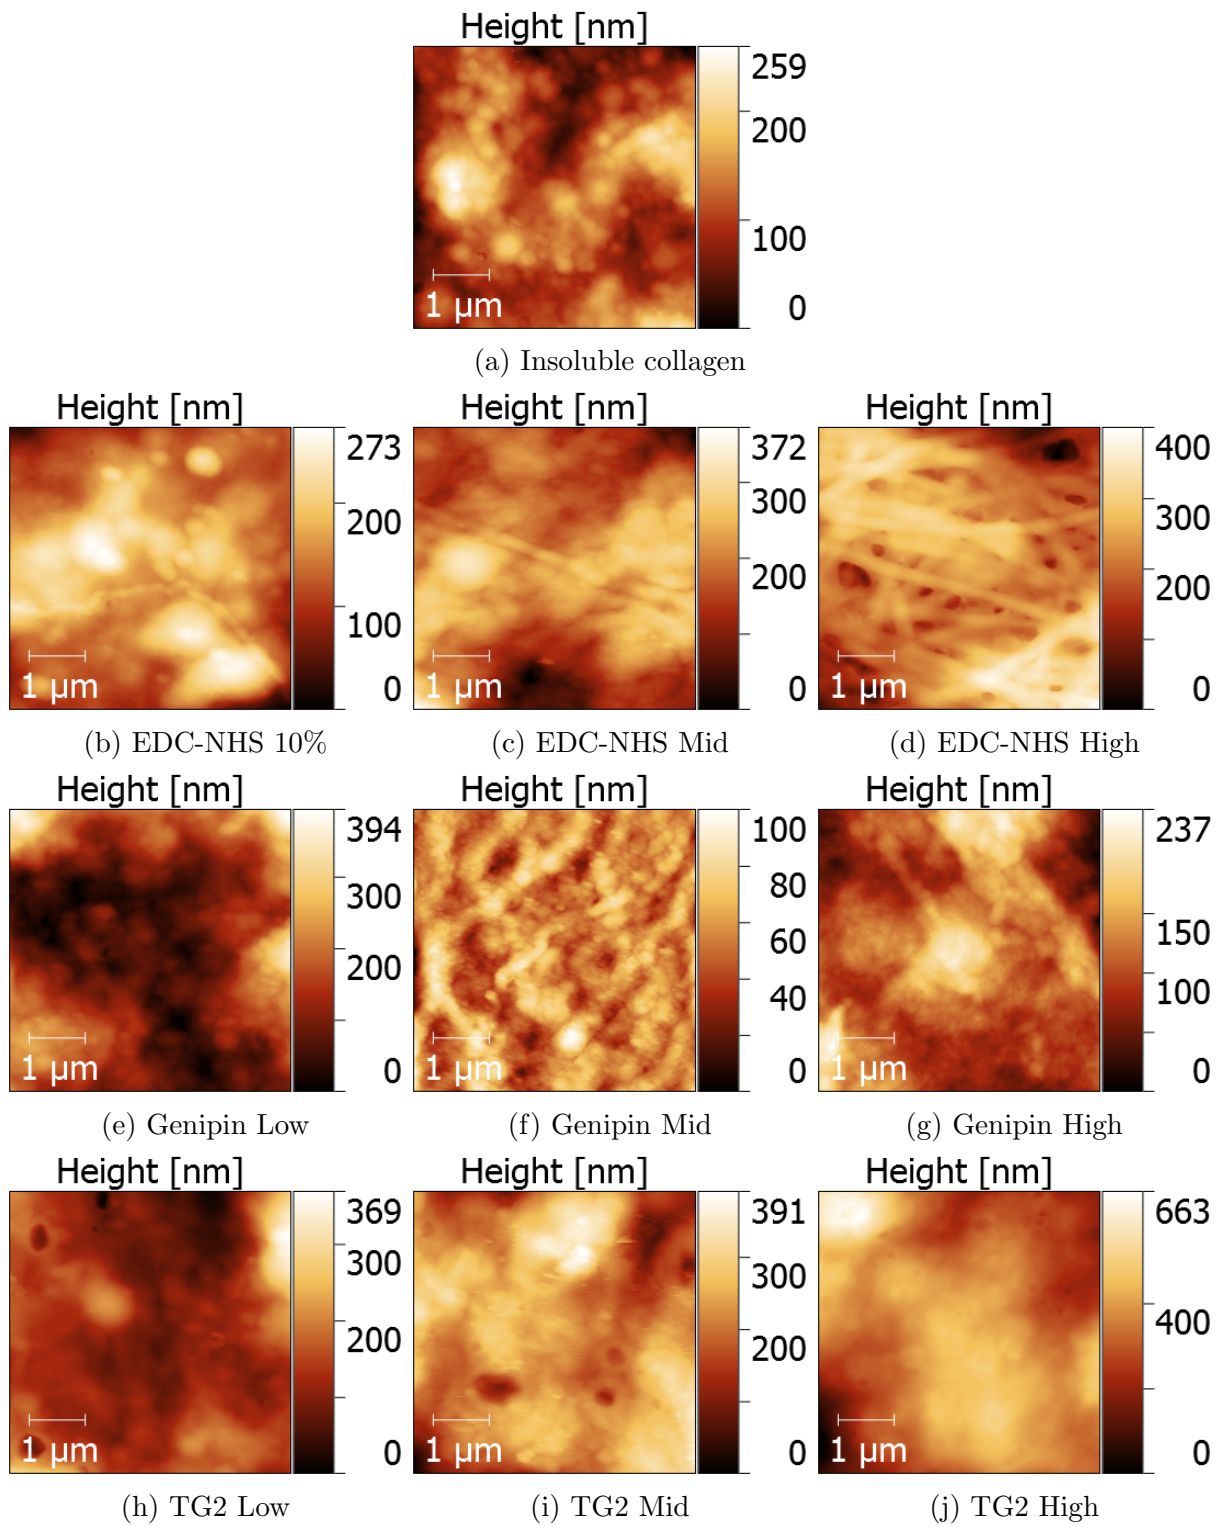

Figure 4: QNM Height Channel

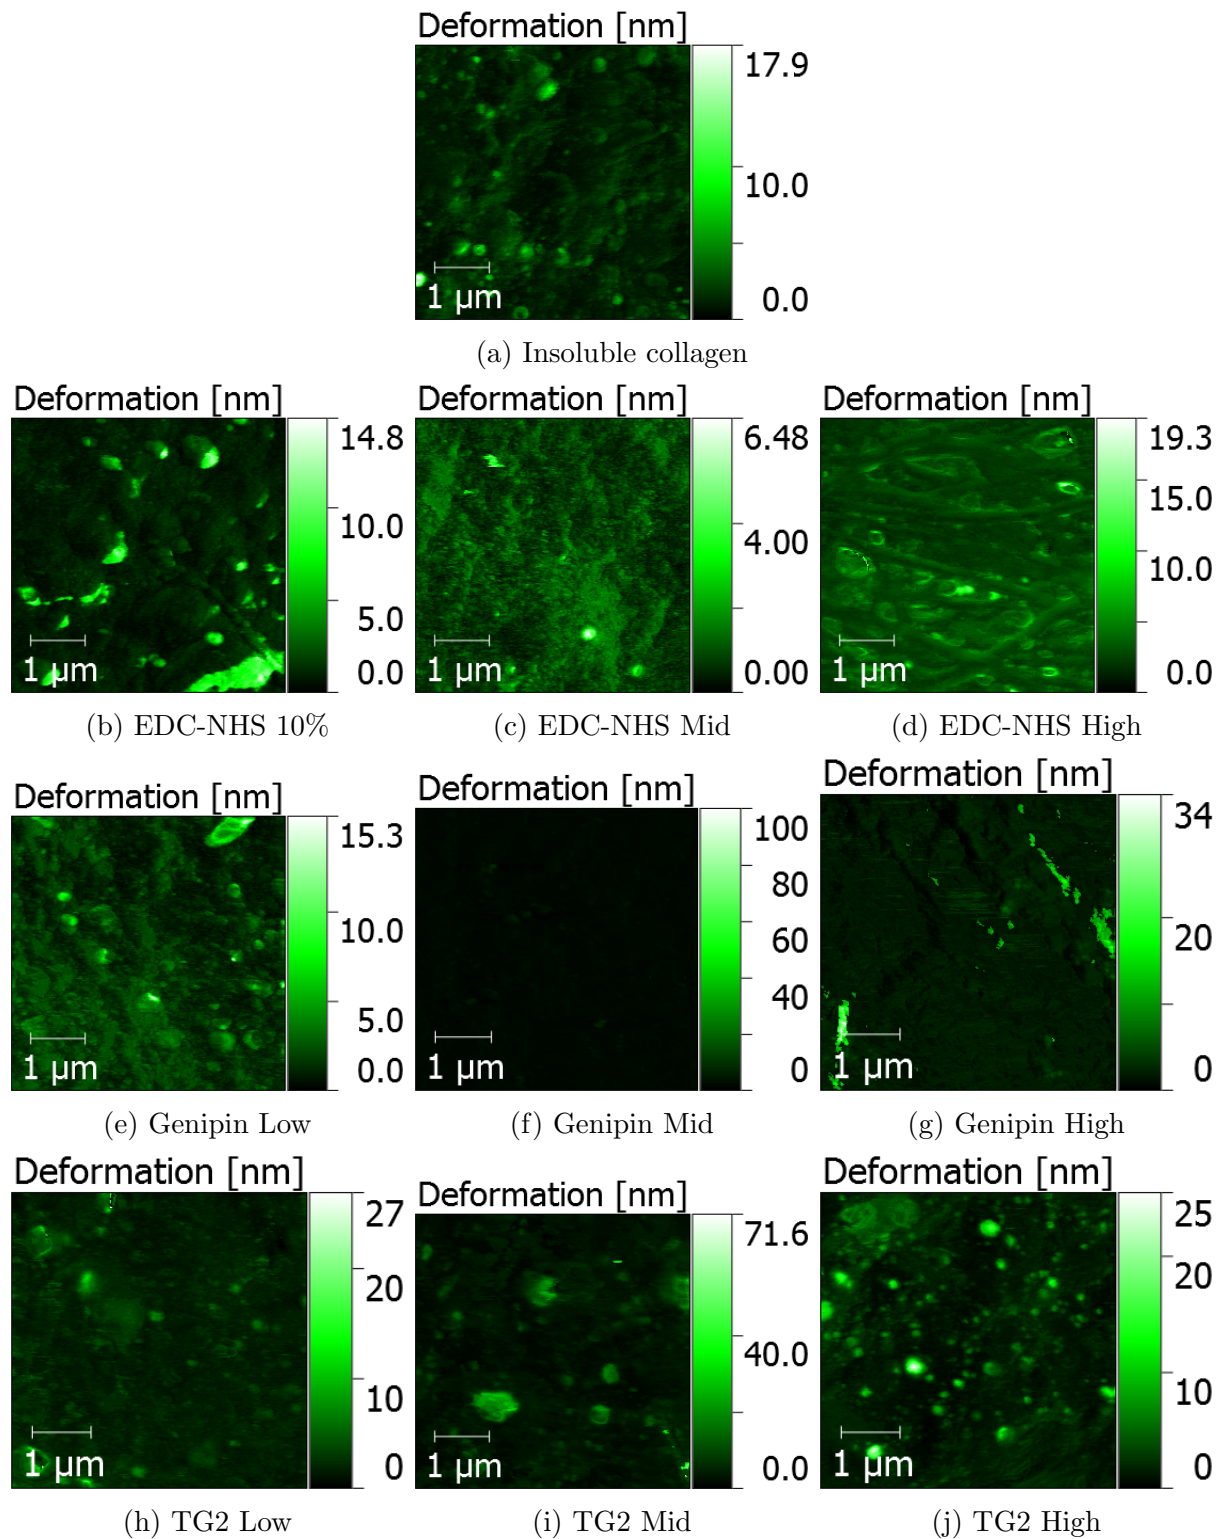

Figure 5: QNM Deformation Channel



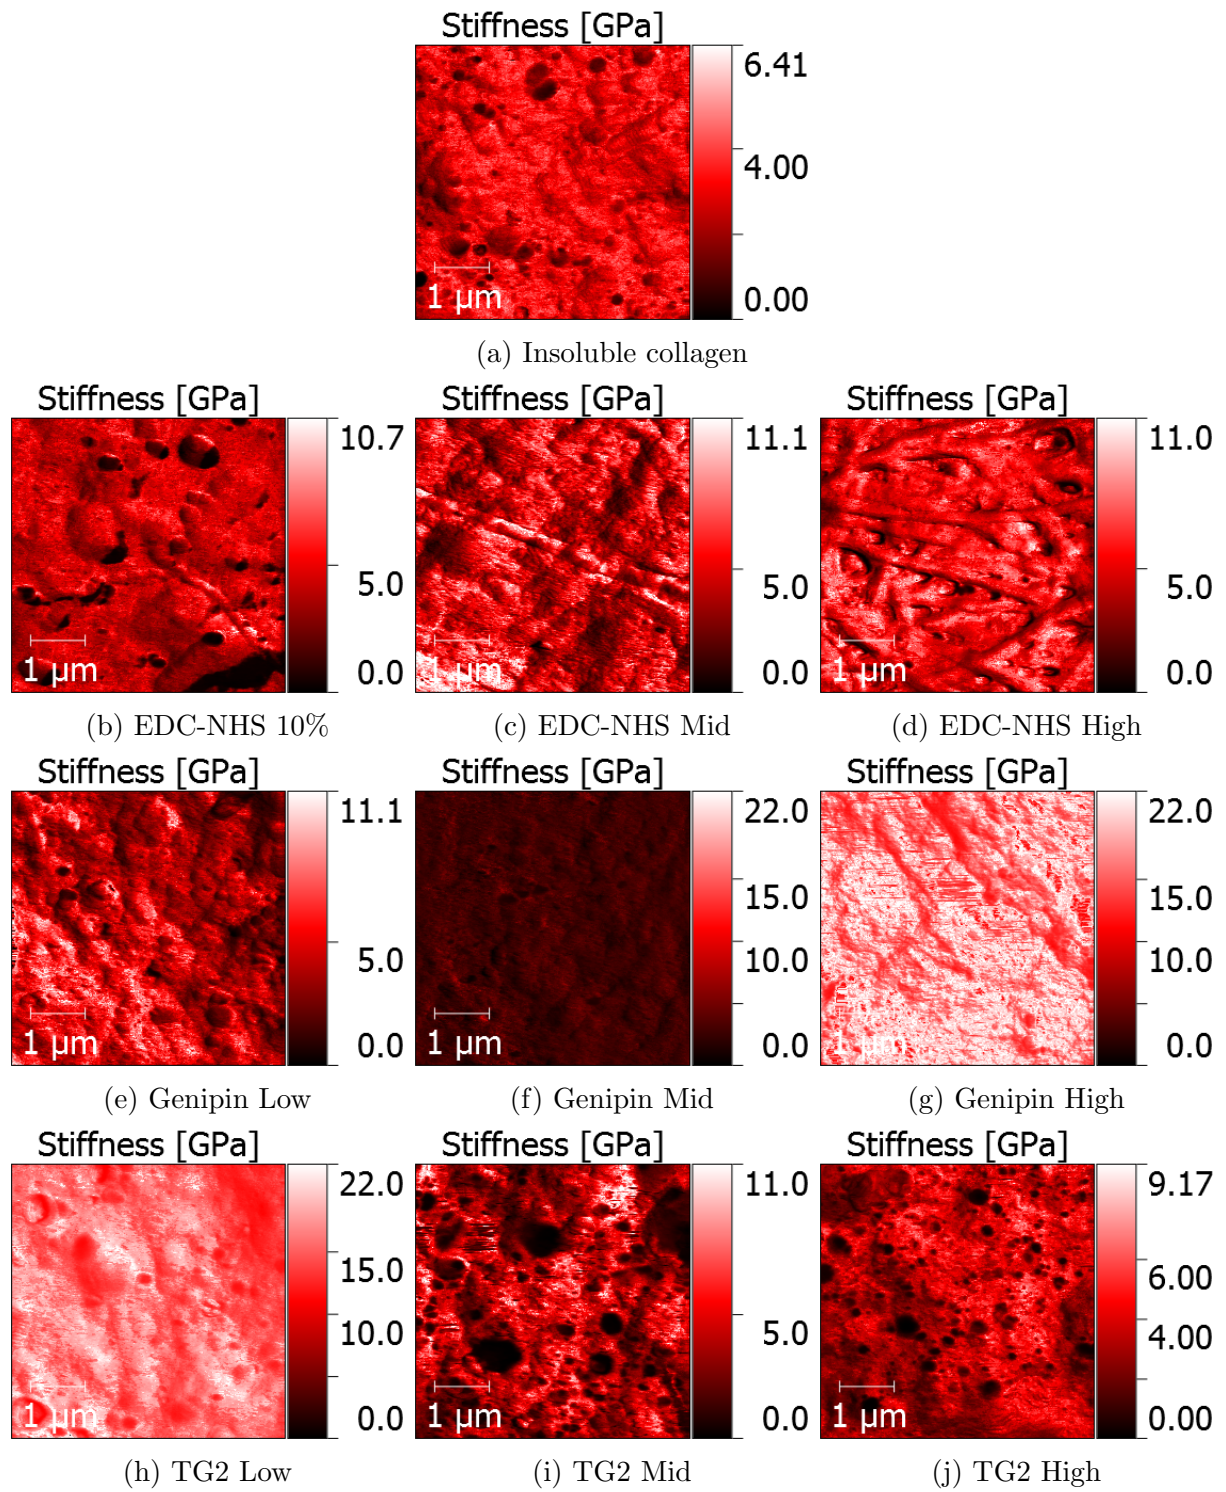

Figure 6: QNM Stiffness Channel

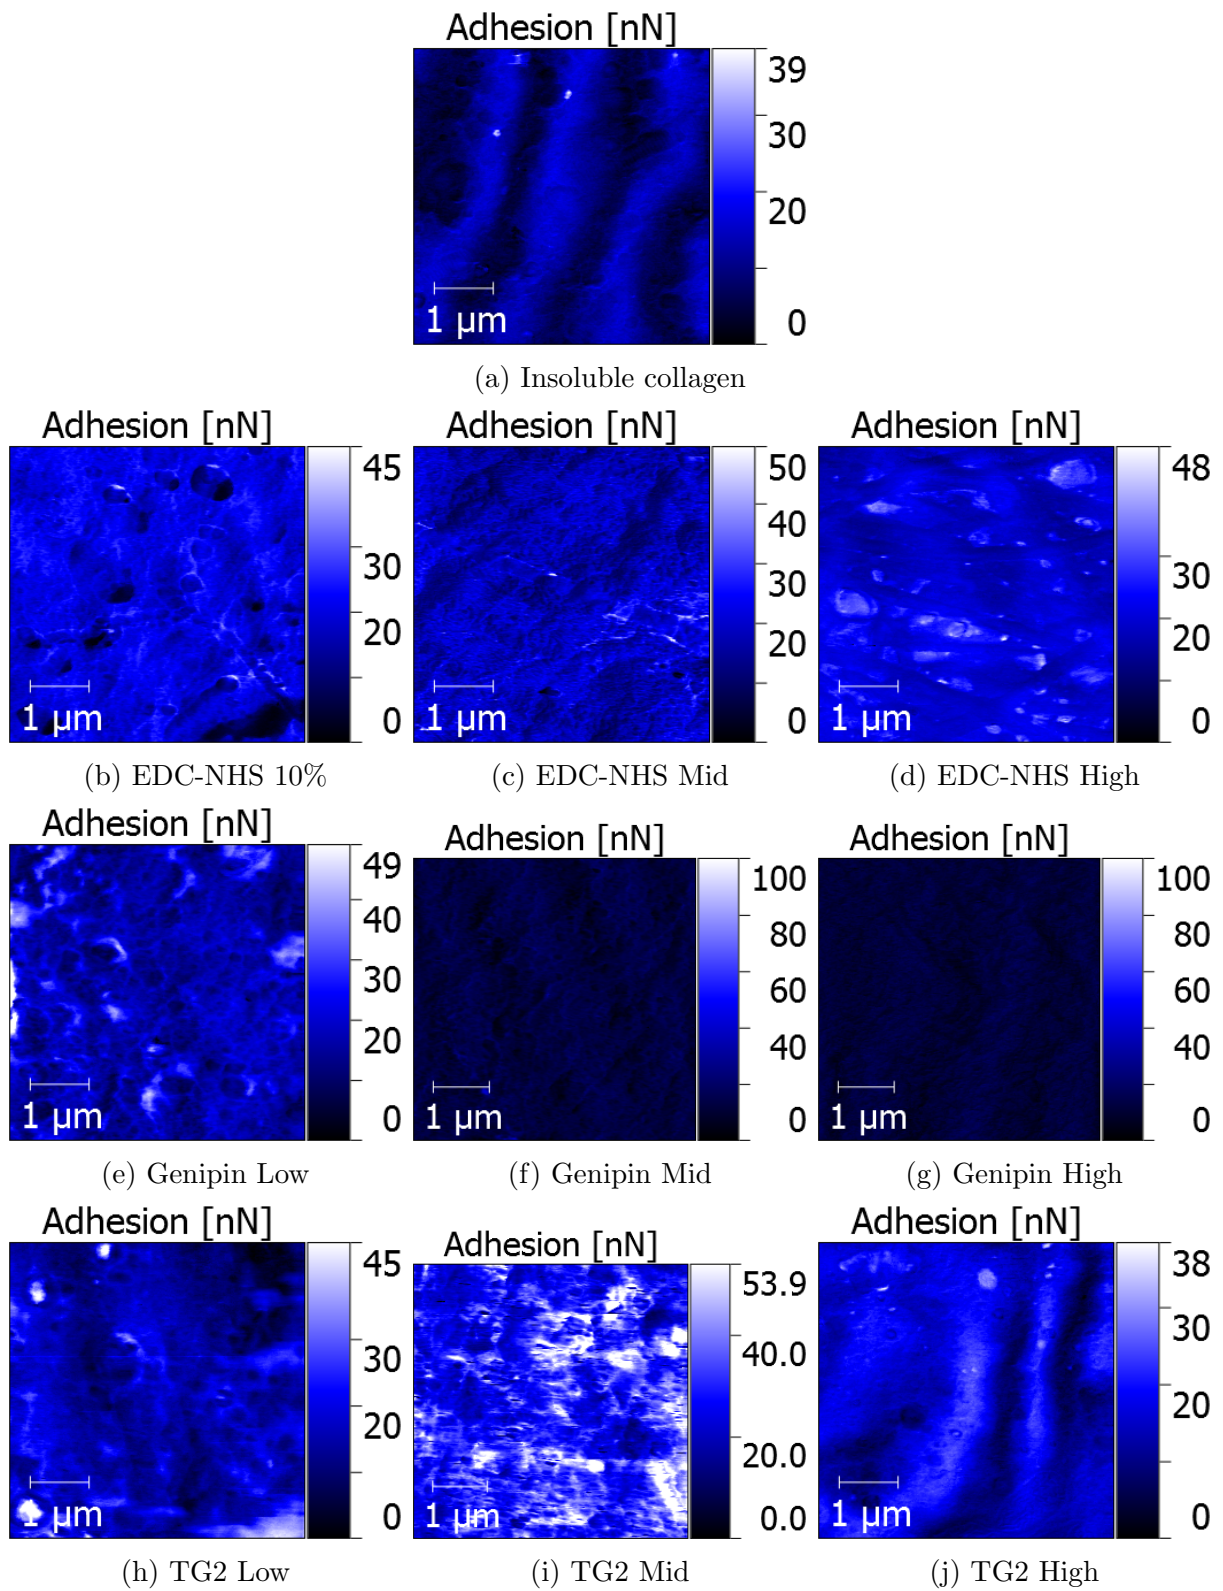

Figure 7: QNM Adhesion Channel

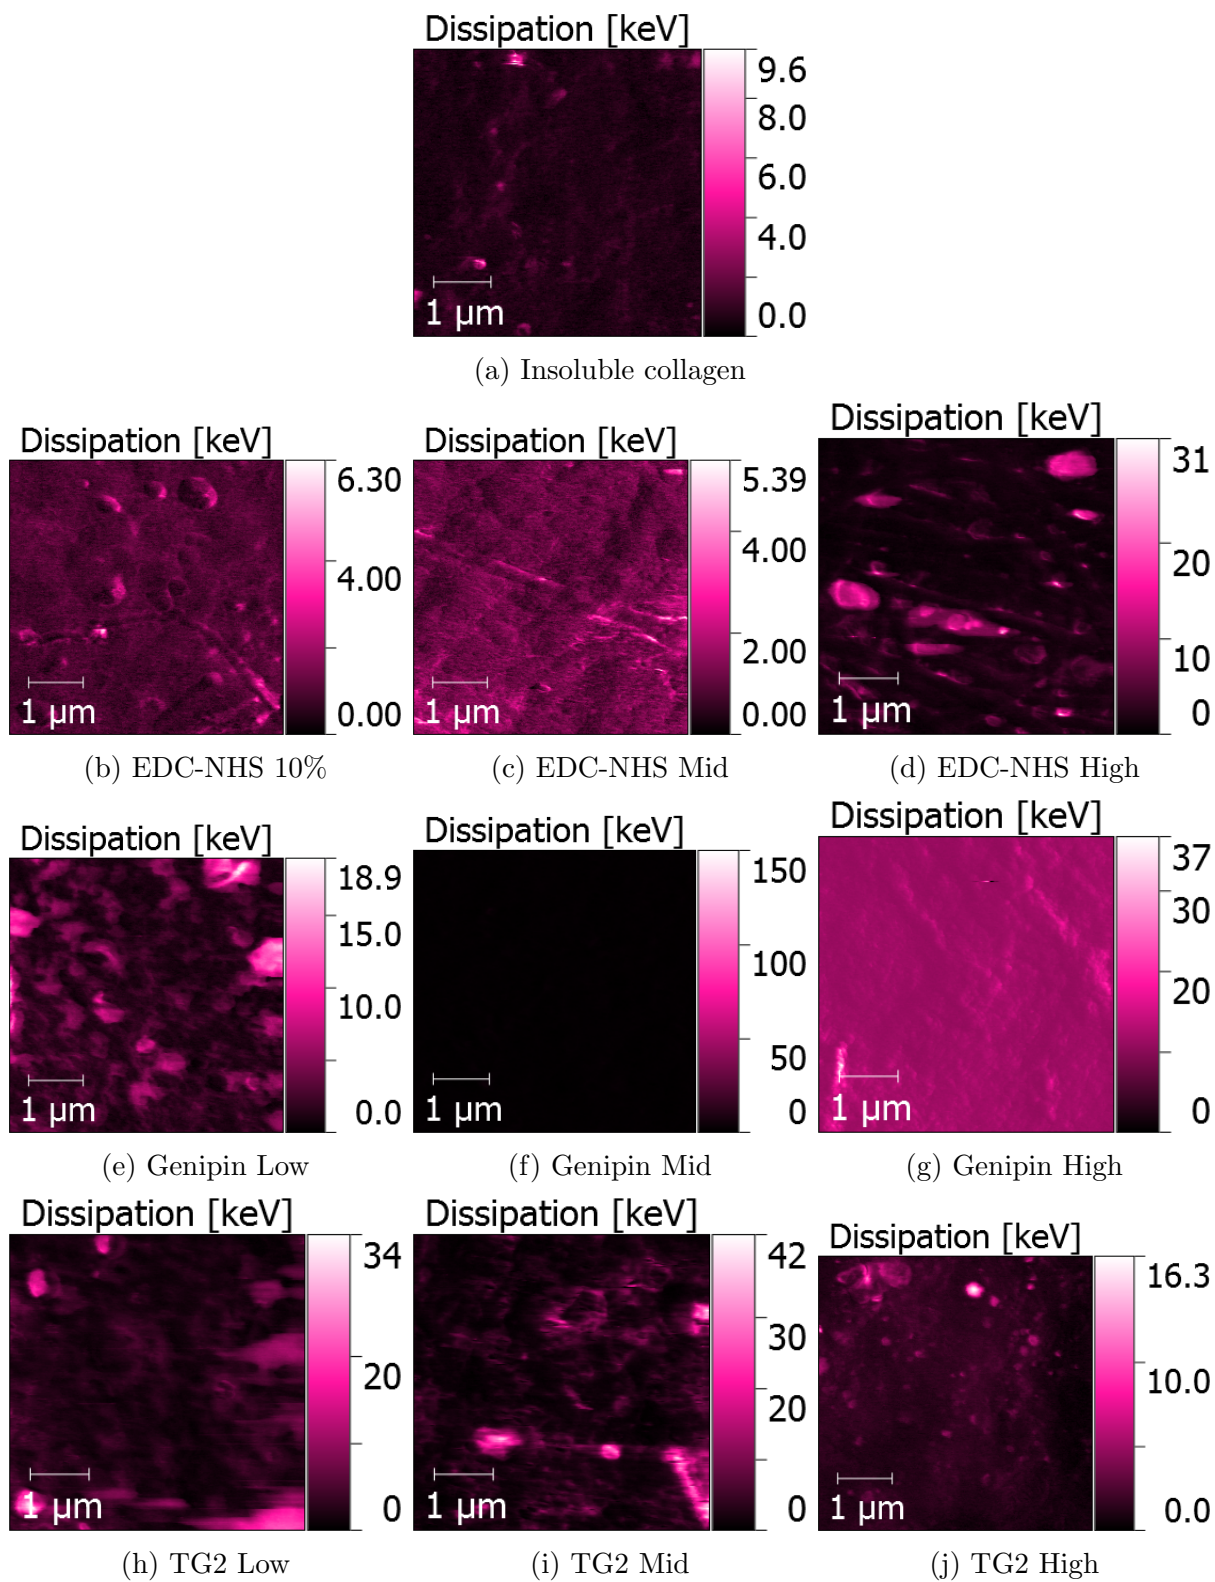

Figure 8: QNM Dissipation Channel



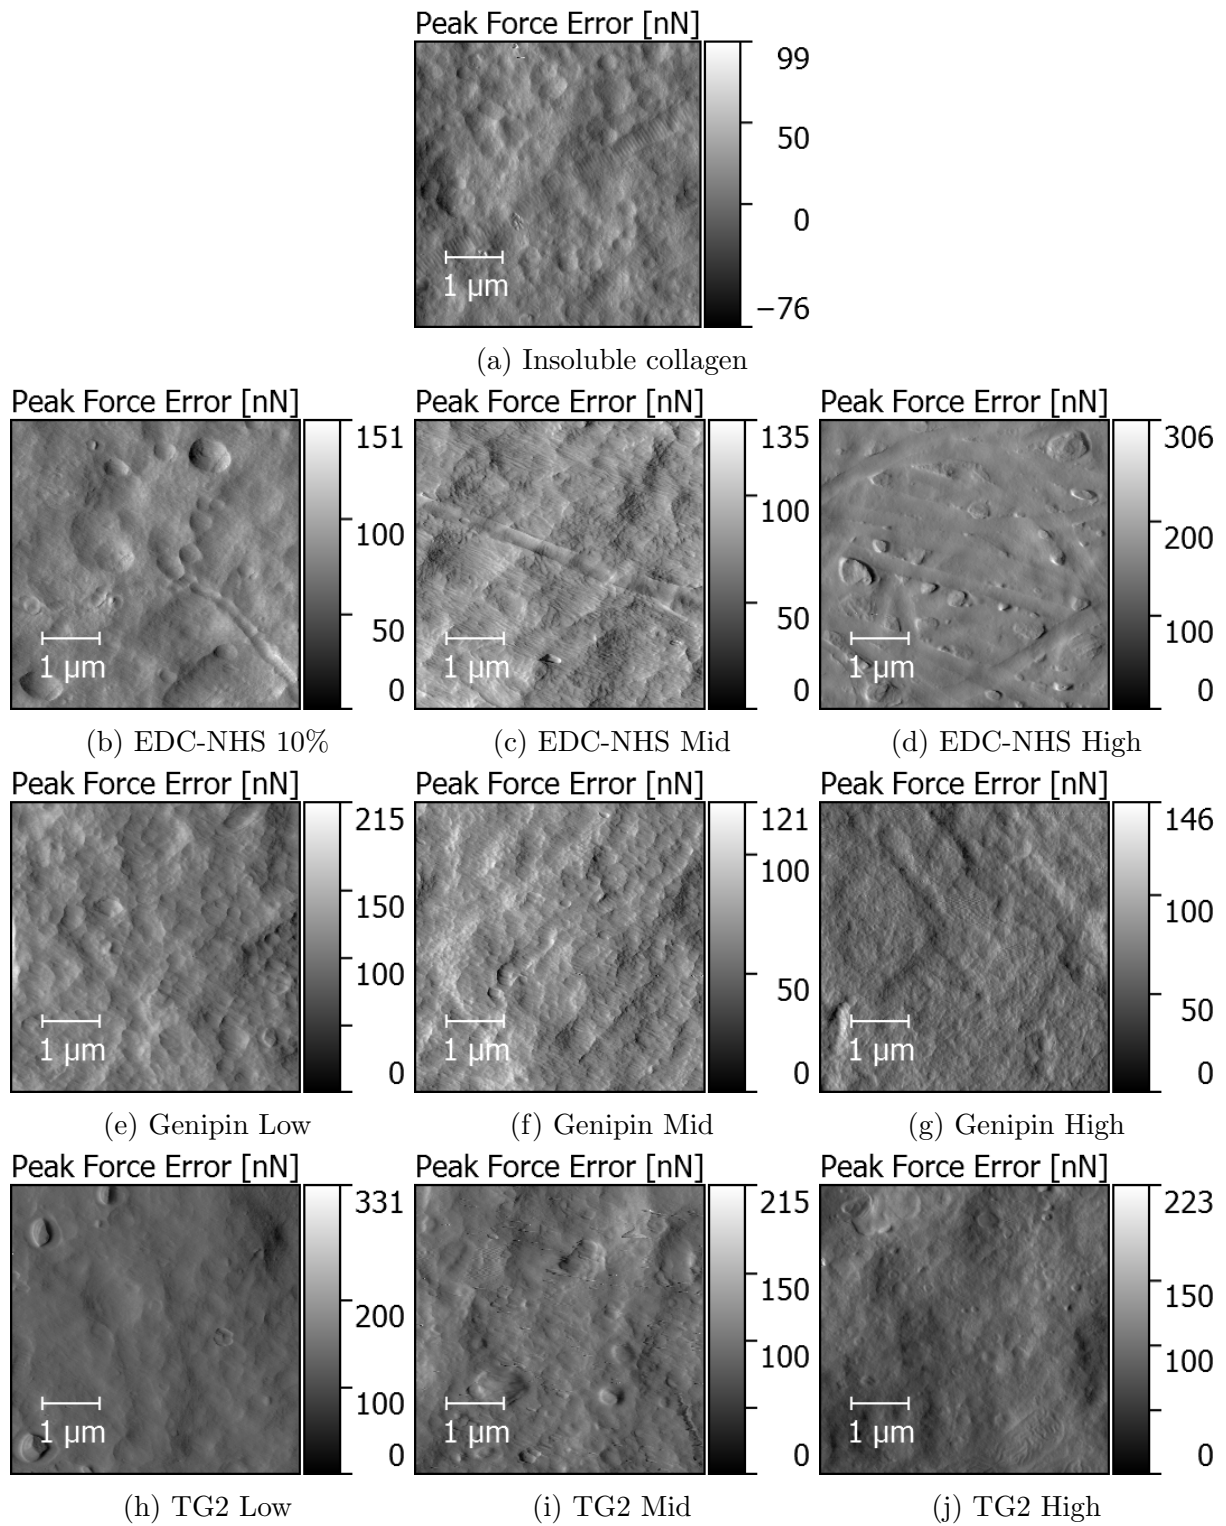

Figure 9: QNM Peak Force Error Channel



## 1.2 Kelvin Probe Force Microscopy

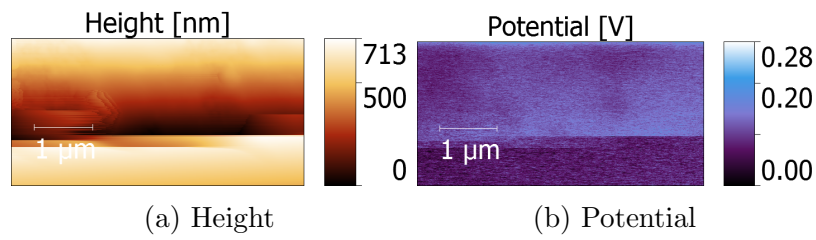

Figure 10: KPFM Control: ITO coated glass

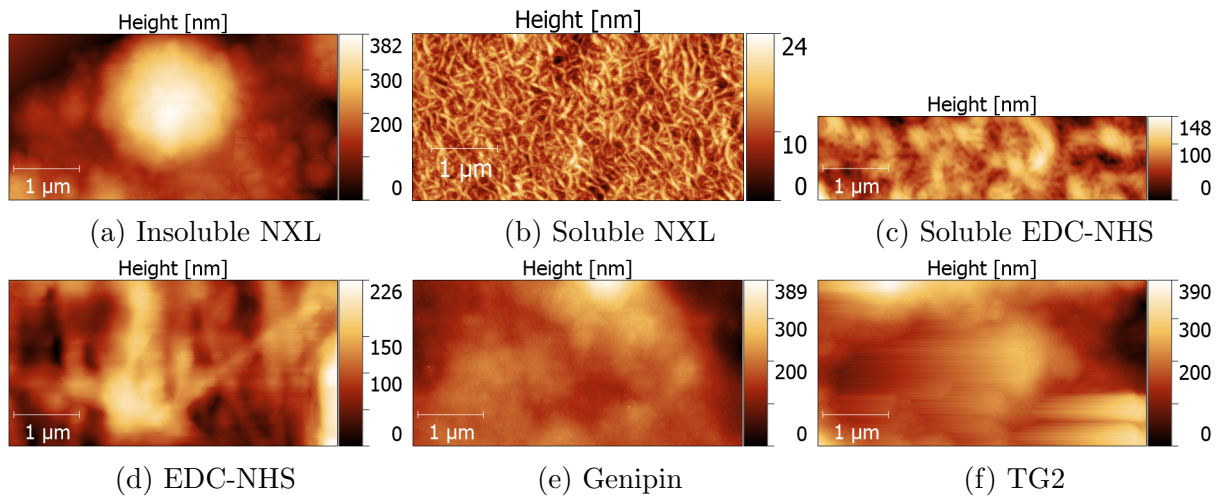

Figure 11: KPFM Height Channel

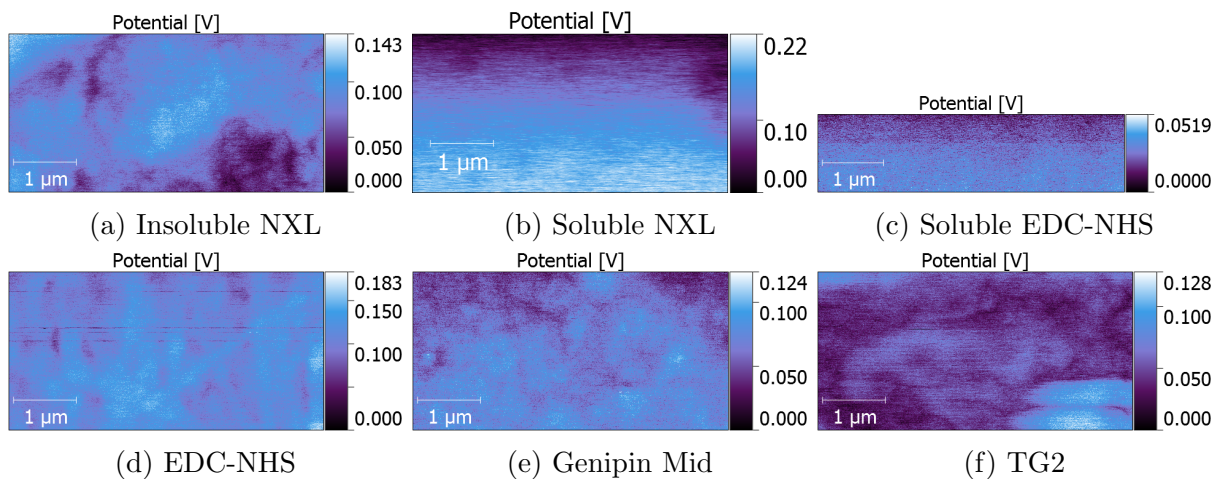

Figure 12: KPFM Potential Channel

### 1.3 Piezoresponse Force Microscopy

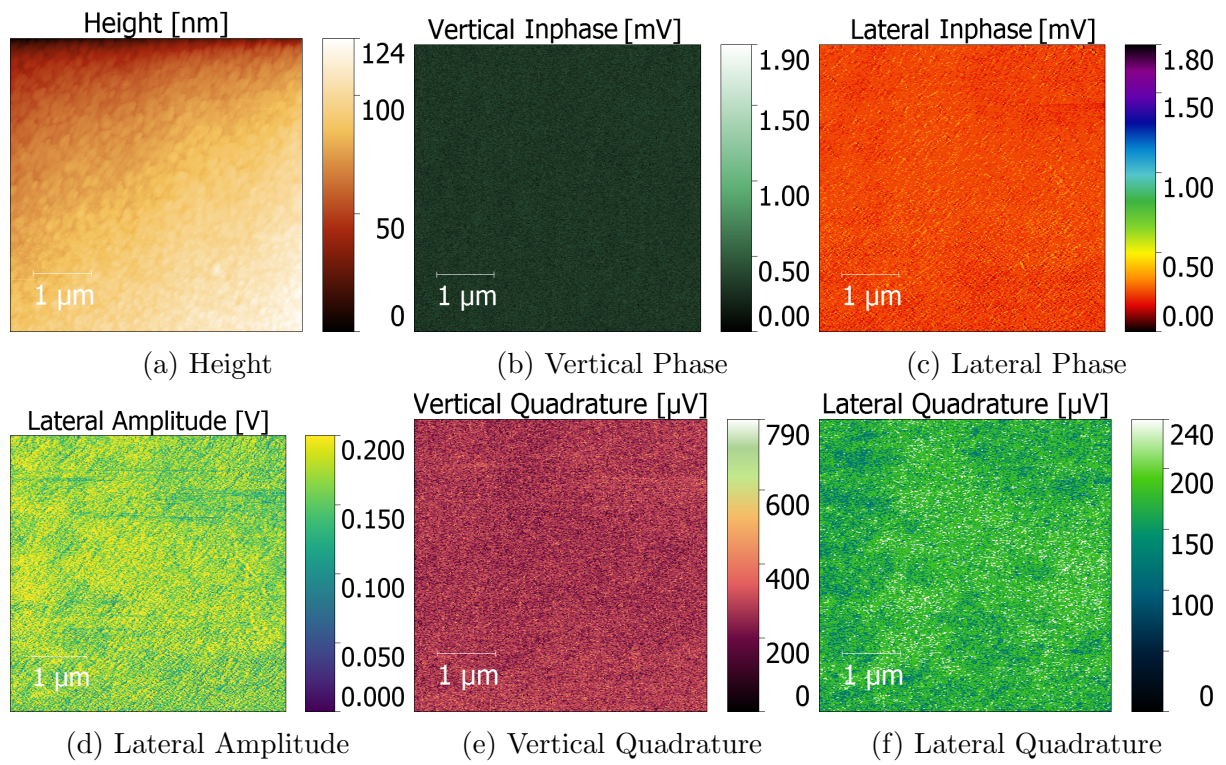

Figure 13: PFM Channels: ITO Coated Glass



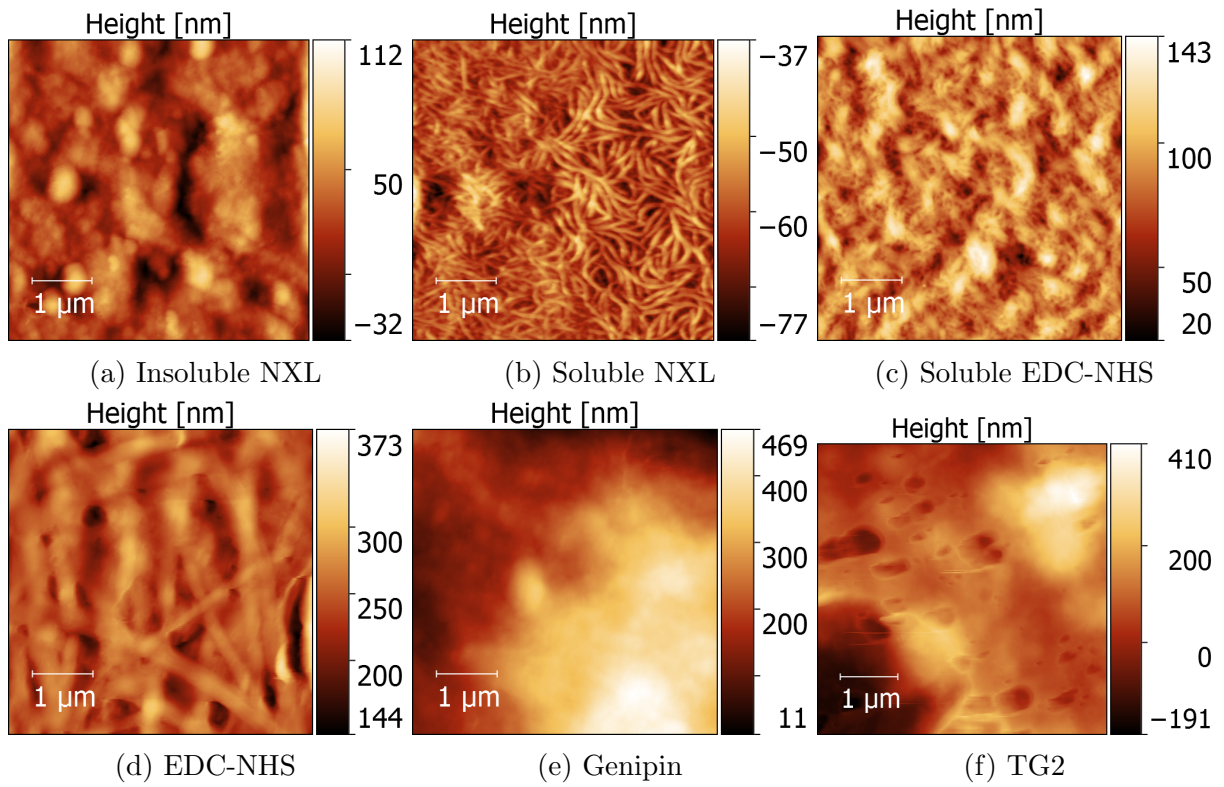

Figure 14: PFM Height Channel

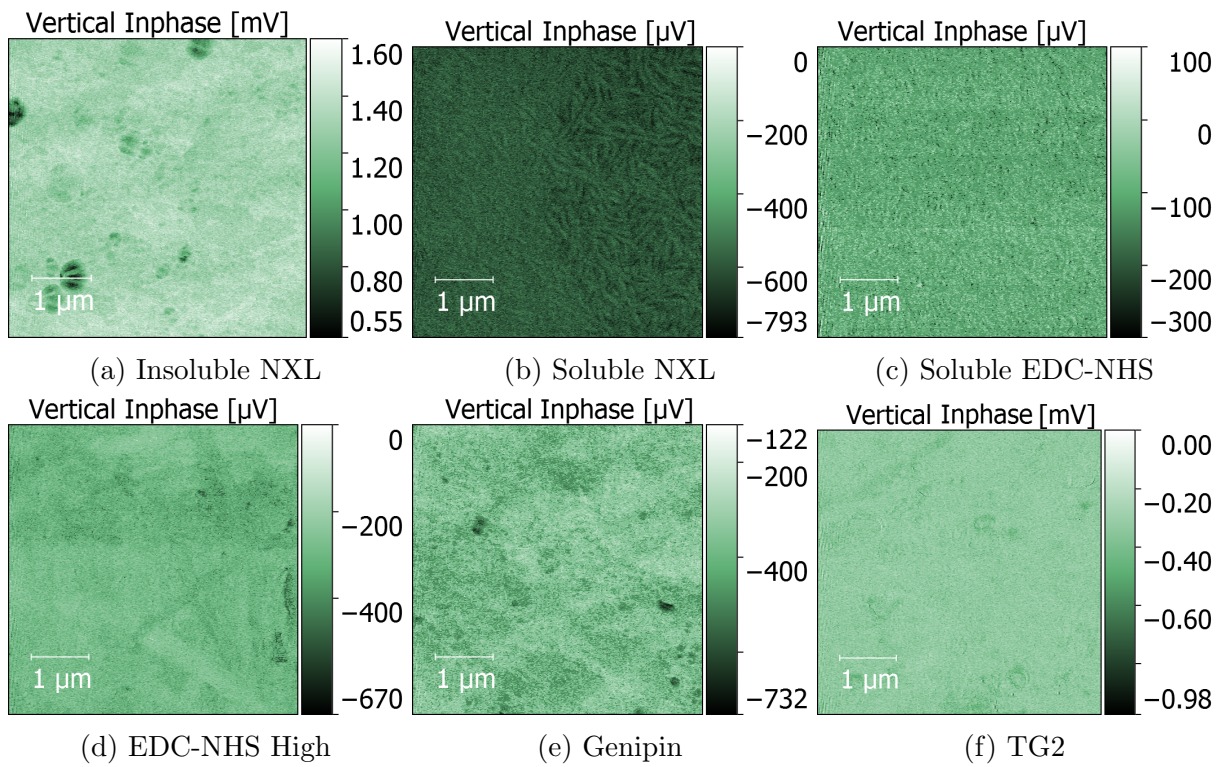

Figure 15: PFM Vertical Phase Channel



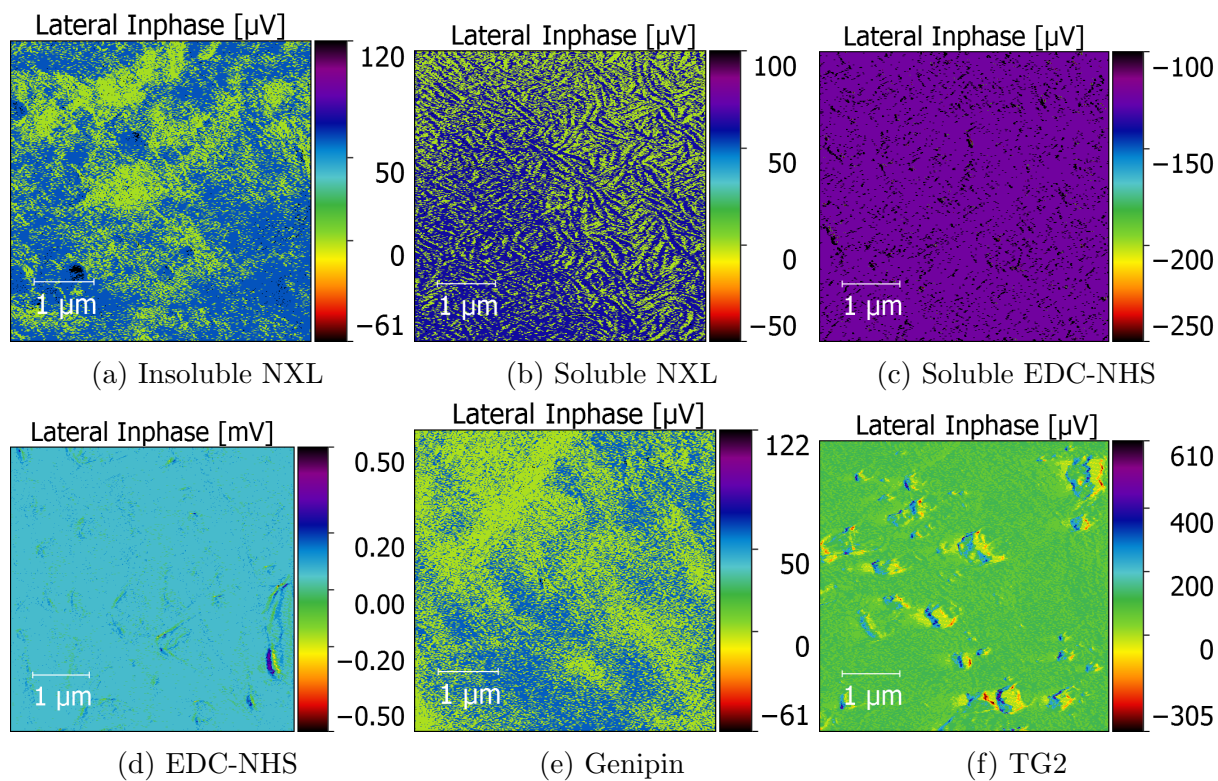

Figure 16: PFM Lateral Phase Channel

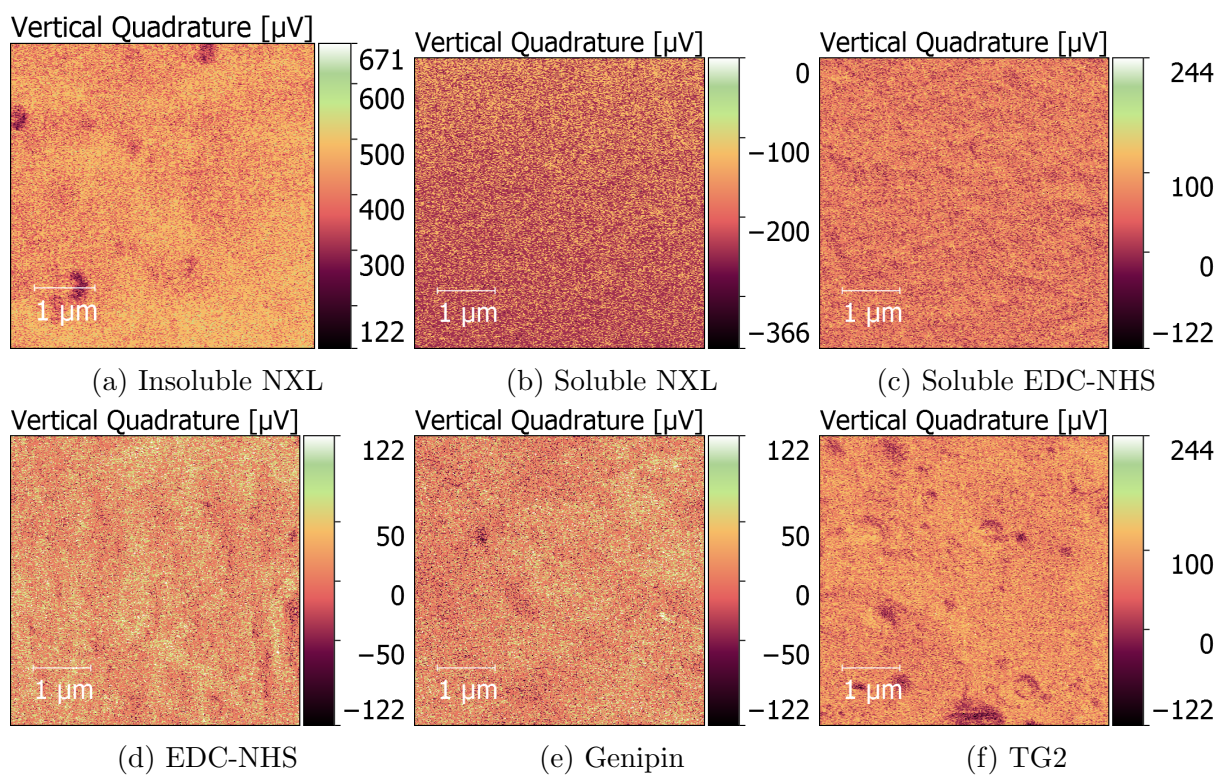

Figure 17: PFM Vertical Quadrature Channel



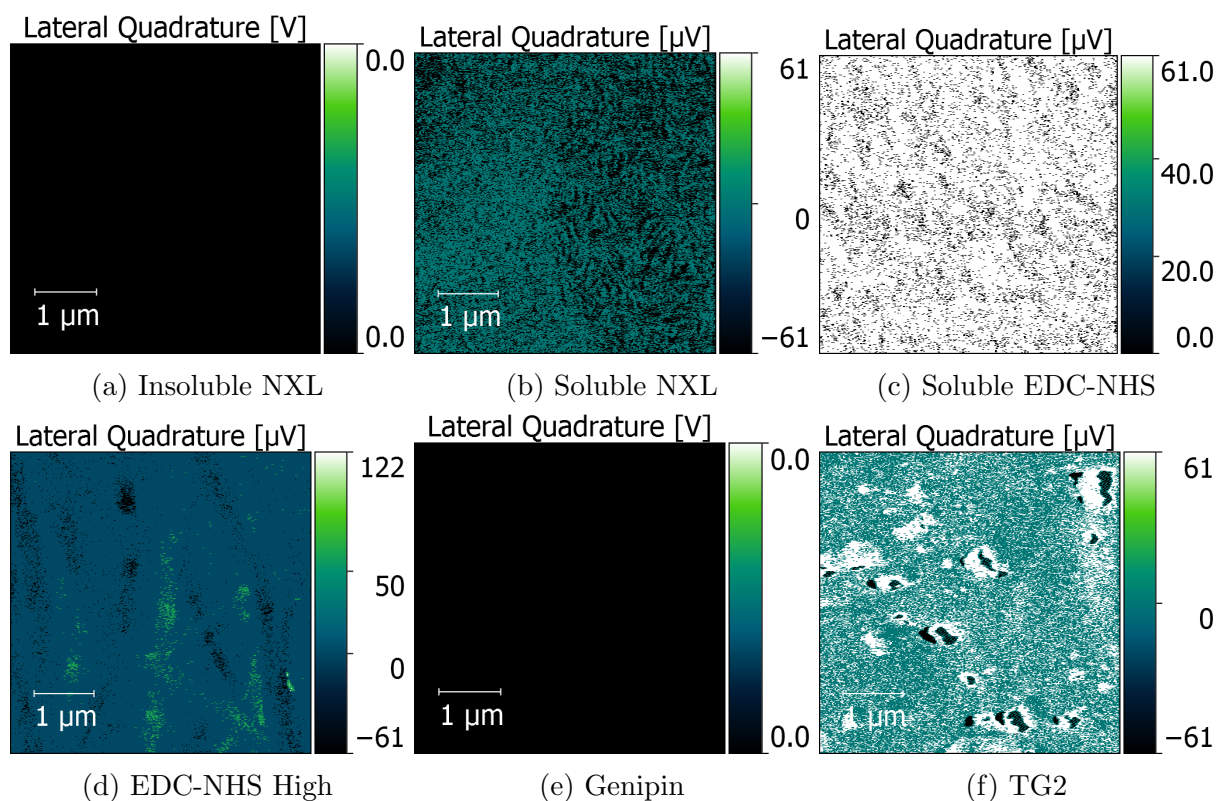

Figure 18: PFM Lateral Quadrature Channel

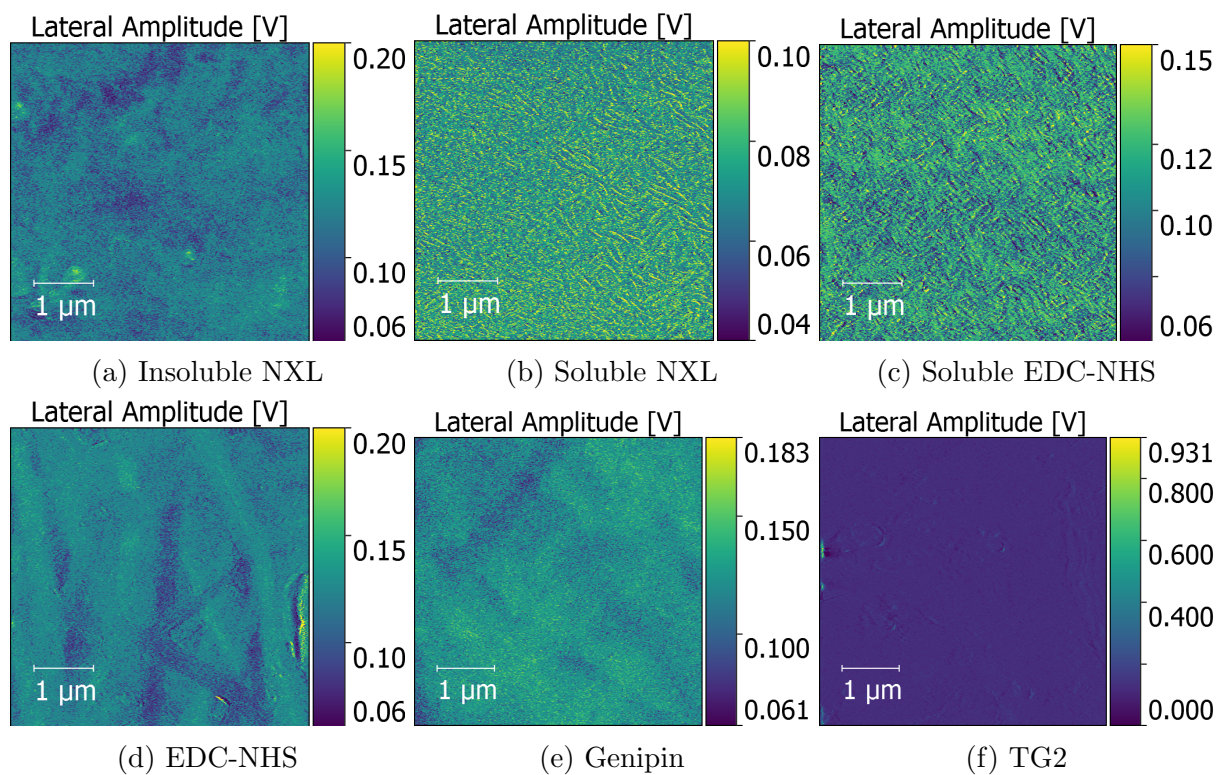

Figure 19: PFM Lateral Amplitude Channel

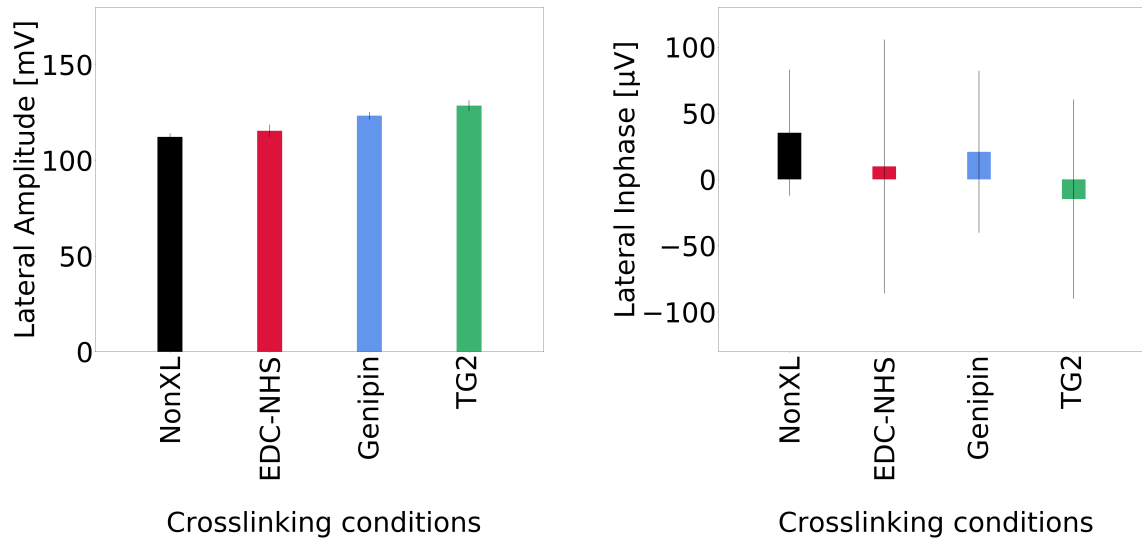

Figure 20: Numerical averages of lateral inphase and amplitude channels

## 2 Profilometry

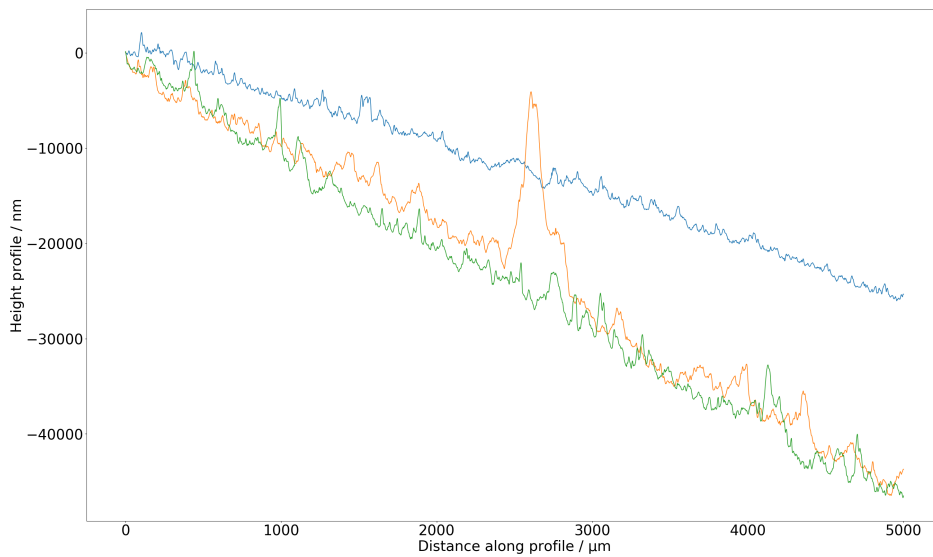

Figure 21: Height profile against three representative samples of cast collagen samples, showing large variations in thickness across the sample.
